# Supplementary material for: Effect of puckering motion and hydrogen bond formation on the vibrational circular dichroism spectrum of a flexible molecule: the case of (S)-1-indanol
Source: Royal Society of Chemistry journal article supplement (doi:10.1039/c8cp01695j), 2018-01-01
Supplement: c8cp01695j1.pdf [file c8cp01695j1.pdf]

## Effect of Puckering Motion and Hydrogen Bond Formation on the Vibrational Circular Dichroism Spectrum of a Flexible Molecule: the case of (S)-1-Indanol

Katia Le Barbu-Debus,<sup>a)</sup> Arne Scherrer,<sup>b) c)</sup> Aude Bouchet,<sup>a)</sup>

Daniel Sebastiani,<sup>c)</sup> Rodolphe Vuilleumier,<sup>\* b)</sup> Anne Zehnacker,<sup>\* a)</sup>

*a) Institut des Sciences Moléculaires d'Orsay (ISMO), CNRS, Univ. Paris-Sud,  
Université Paris-Saclay, F-91405 Orsay (France).*

*b) PASTEUR, Département de chimie, École normale supérieure, PSL University,  
Sorbonne Université, CNRS, 75005 Paris, France*

*c) Martin-Luther-Universität Halle-Wittenberg, Institut für Chemie, von-Danckelmann-  
Platz 4, 06120 Halle, Germany*

\*e-mail: [anne.zehnacker-rentien@u-psud.fr](mailto:anne.zehnacker-rentien@u-psud.fr), [rodolphe.vuilleumier@ens.fr](mailto:rodolphe.vuilleumier@ens.fr)

### Supplementary Information

Table S1 Energetic and structural parameters of the most stable conformers of (S)-1-indanol in a CCl<sub>4</sub> continuum calculated at the BLYP/6-31G++(d,p) level

| Geometry | Gibbs free energy (kcal/mol) | Boltzmann population (%) | C <sub>9</sub> C <sub>4</sub> C <sub>3</sub> C <sub>2</sub> angle (°) | C <sub>9</sub> C <sub>1</sub> OH angle (°) |
|----------|------------------------------|--------------------------|-----------------------------------------------------------------------|--------------------------------------------|
| 1eq      | 0.00                         | 28                       | 16.4                                                                  | 55.1                                       |
| 1ax      | 0.16                         | 22                       | -12.7                                                                 | 44.9                                       |
| 2ax      | 0.64                         | 10                       | -14.2                                                                 | -54.6                                      |
| 3eq      | 0.56                         | 11                       | 16.0                                                                  | -167.4                                     |
| 2eq      | 0.21                         | 20                       | 15.7                                                                  | -77.4                                      |
| 3ax      | 0.67                         | 9                        | -14.7                                                                 | -176.0                                     |

Table S2 Energetic and structural parameters of the most stable conformers of (S)-1-indanol in a DMSO continuum calculated at the B3LYP-D3/6-31G++(d,p) level

| Geometry | Gibbs free energy (kcal/mol) | Boltzmann population (%) | C <sub>9</sub> C <sub>4</sub> C <sub>3</sub> C <sub>2</sub> angle (°) | C <sub>9</sub> C <sub>1</sub> OH angle (°) |
|----------|------------------------------|--------------------------|-----------------------------------------------------------------------|--------------------------------------------|
| 1eq      | 0.00                         | 35                       | 17.4                                                                  | 54.9                                       |
| 1ax-a    | 0.05                         | 31                       | -13.7                                                                 | 54.6                                       |
| 1ax-b    | 0.46                         | 16                       | -15.5                                                                 | 48.7                                       |
| 1ax-c    | 0.57                         | 13                       | -16.8                                                                 | 55.0                                       |
| 2ax      | 1.16                         | 5                        | -15.6                                                                 | -44.9                                      |

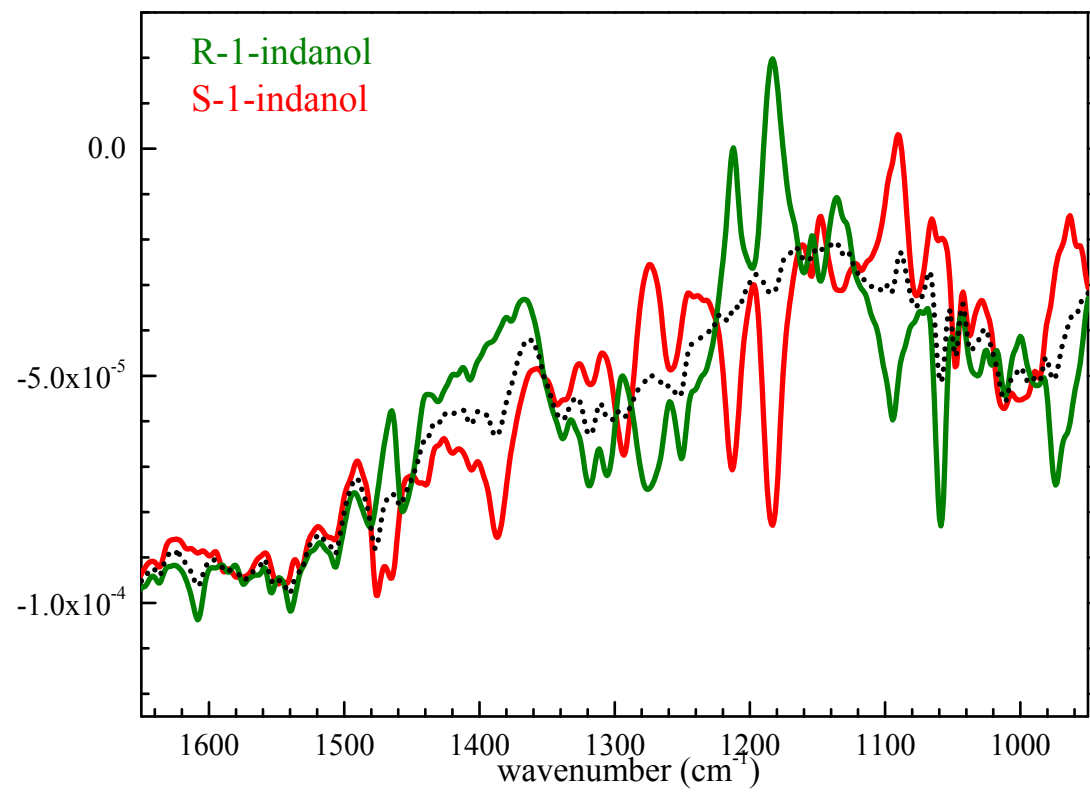

Figure S1: Raw experimental VCD spectra of R and S-1-Indanol together with the baseline (dotted line).

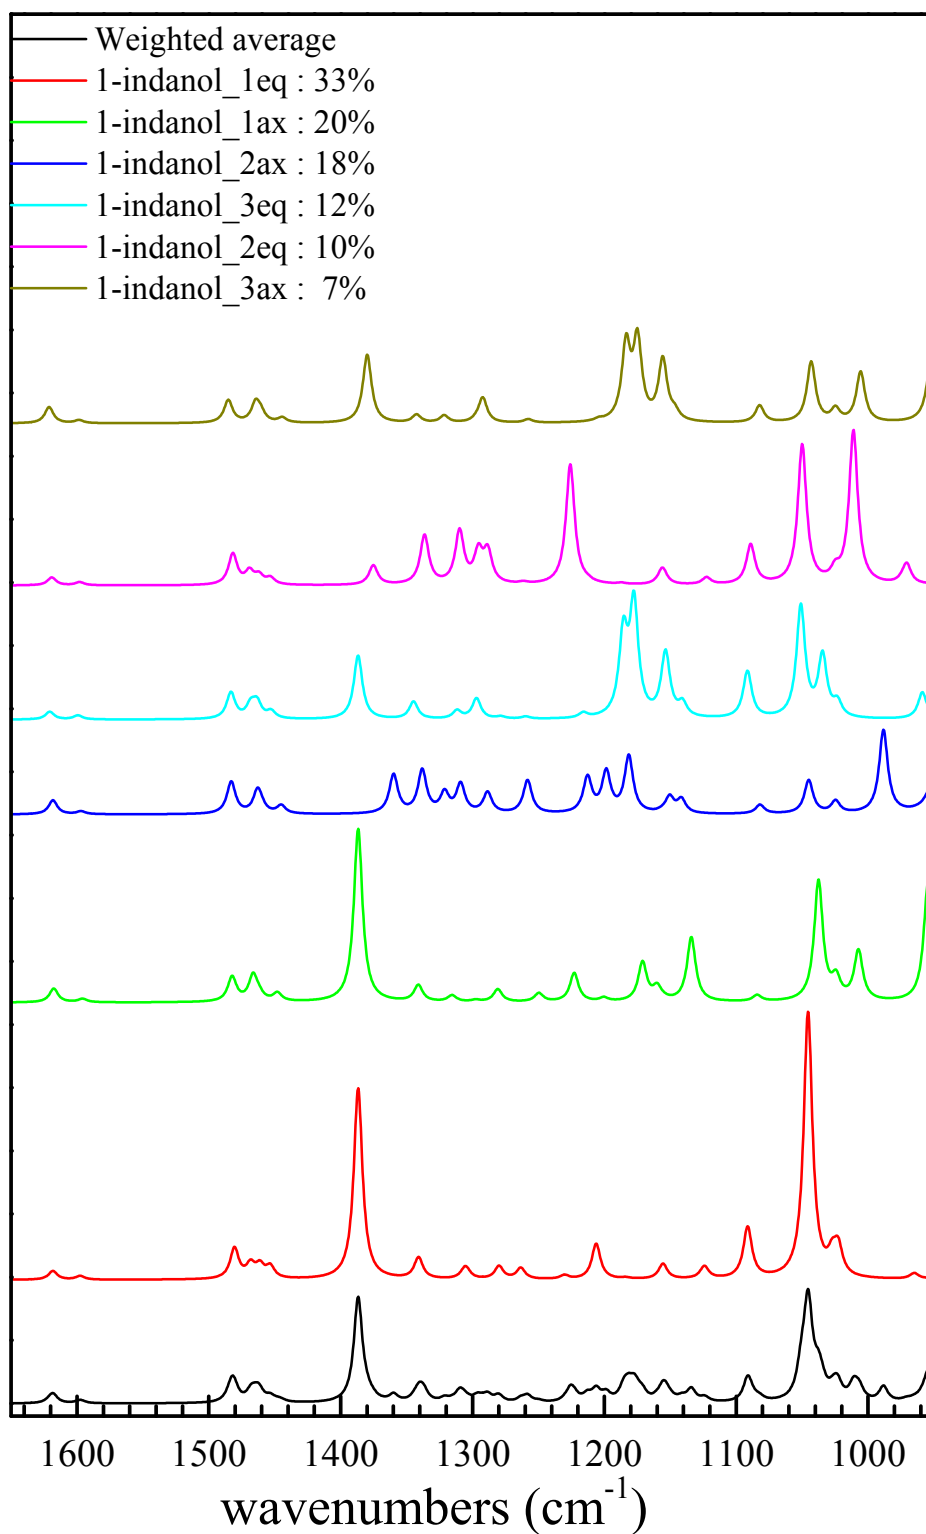

Figure S2: Simulated IR spectrum obtained from the weighted IR spectra of the most stable (S)-1-indanol structures in a  $\text{CCl}_4$  continuum together with individual contributions, calculated at the B3LYP/6-31G++(d, p) level

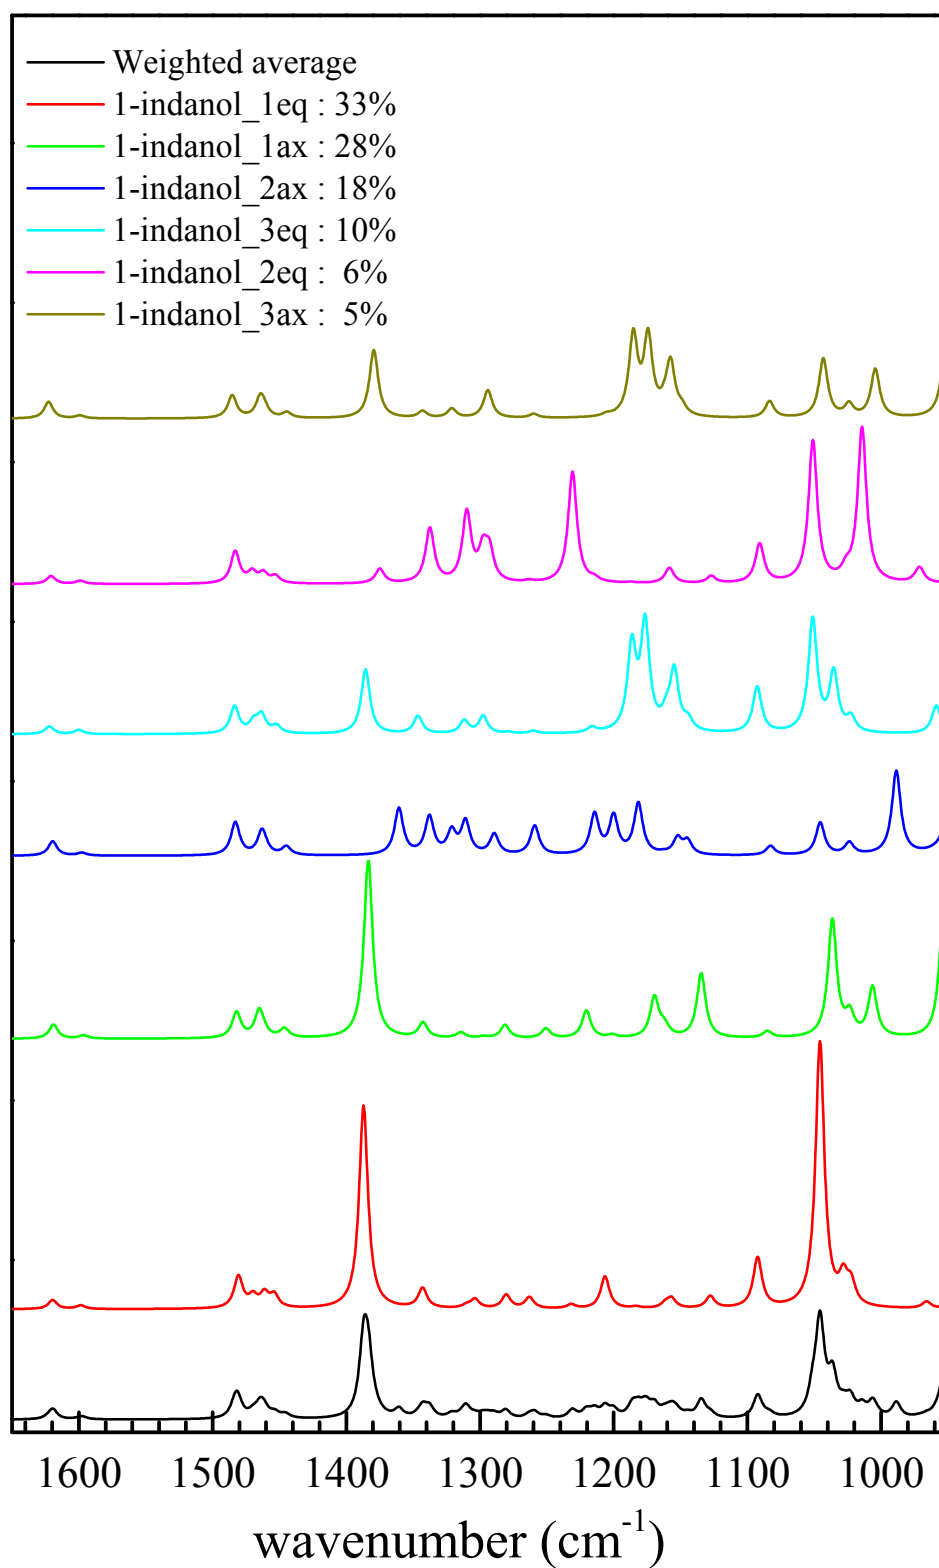

Figure S3: Simulated IR spectrum obtained from the weighted IR spectra of the most stable 1(S)-1-indanol structures in a  $\text{CCl}_4$  continuum together with individual contributions, calculated at the B3LYP-D3/6-31G++(d, p) level

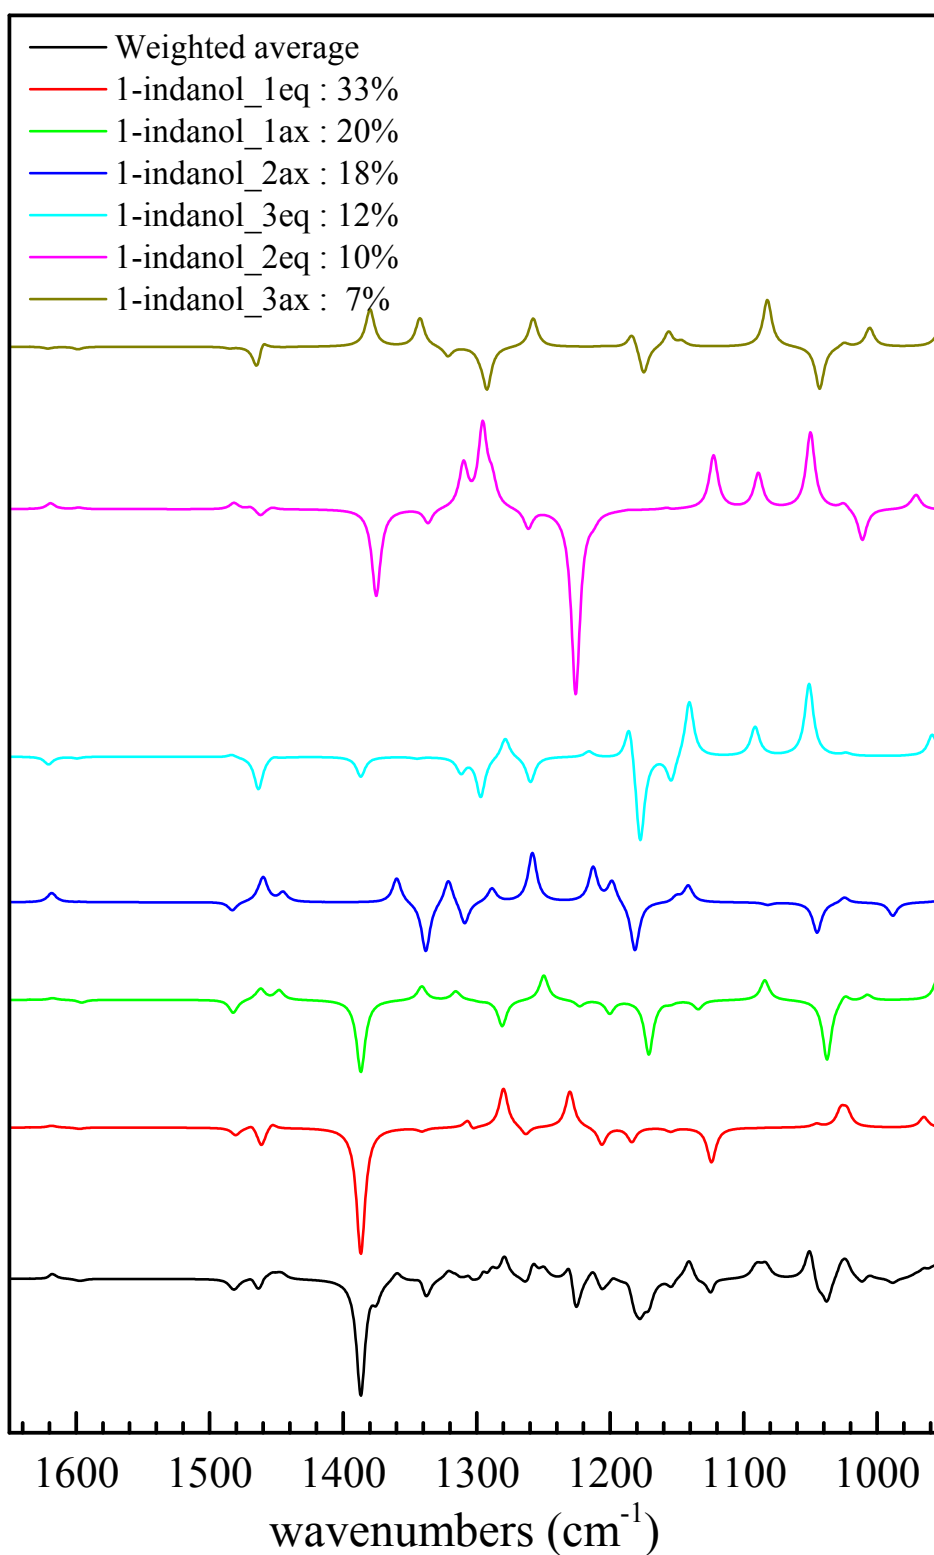

Figure S4: Simulated VCD spectrum obtained from the weighted VCD spectra of the most stable (S)-1-indanol structures in a  $\text{CCl}_4$  continuum together with individual contributions, calculated at the B3LYP/6-31G++(d, p) level

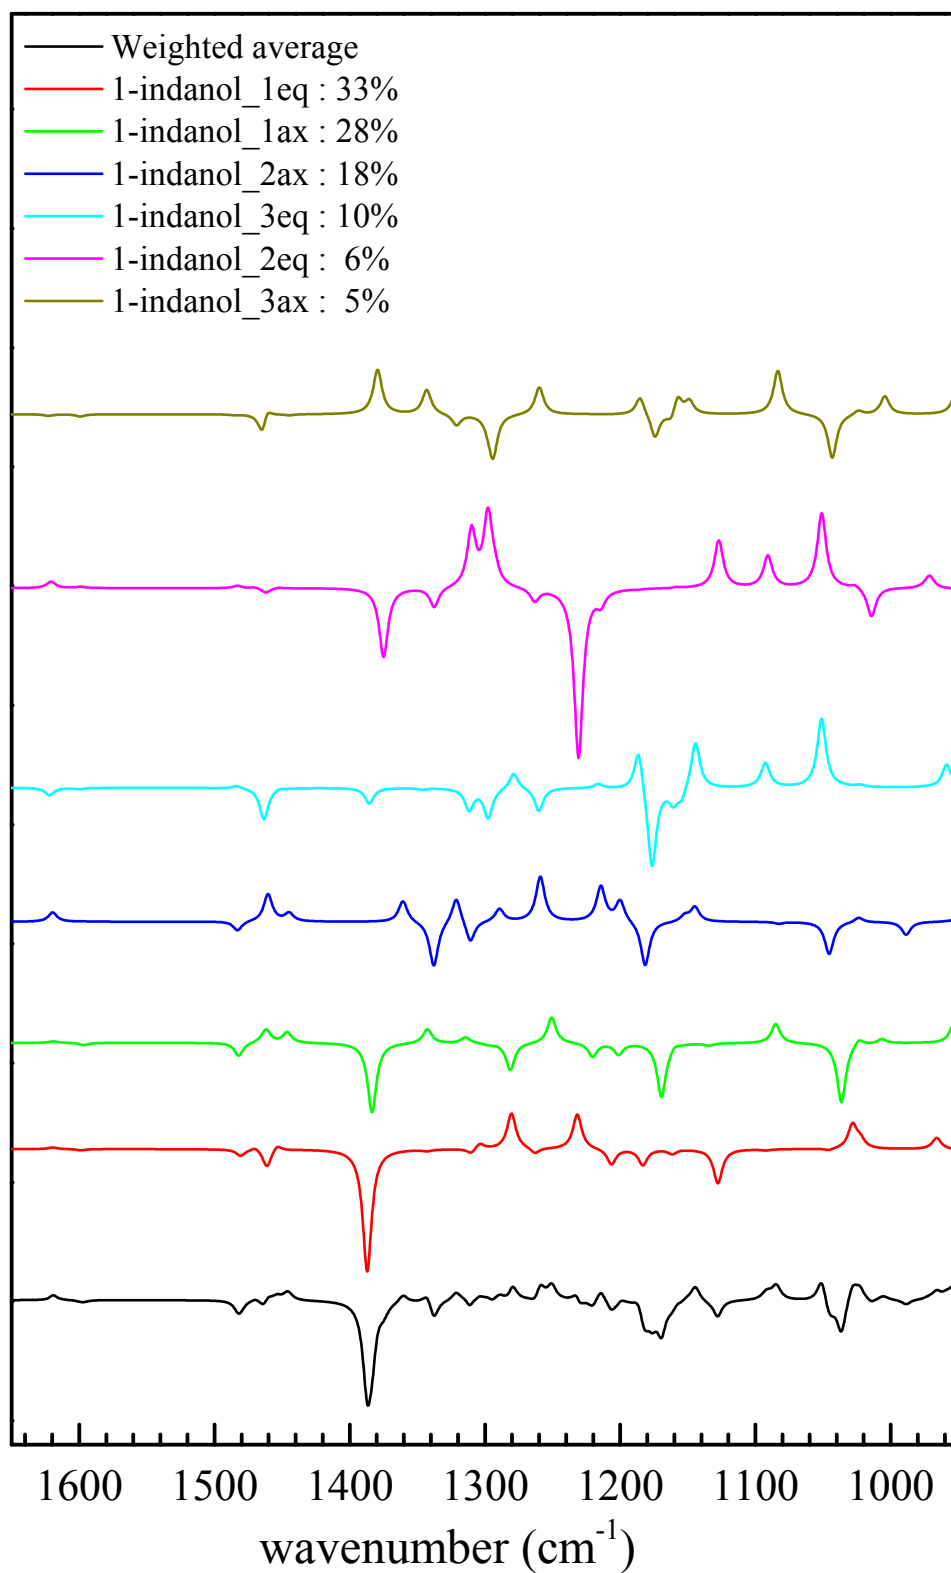

Figure S5: Simulated VCD spectrum obtained from the weighted VCD spectra of the most stable (S)-1-indanol structures in a  $\text{CCl}_4$  continuum together with individual contributions, calculated at the B3LYP-D3/6-31G++(d, p) level

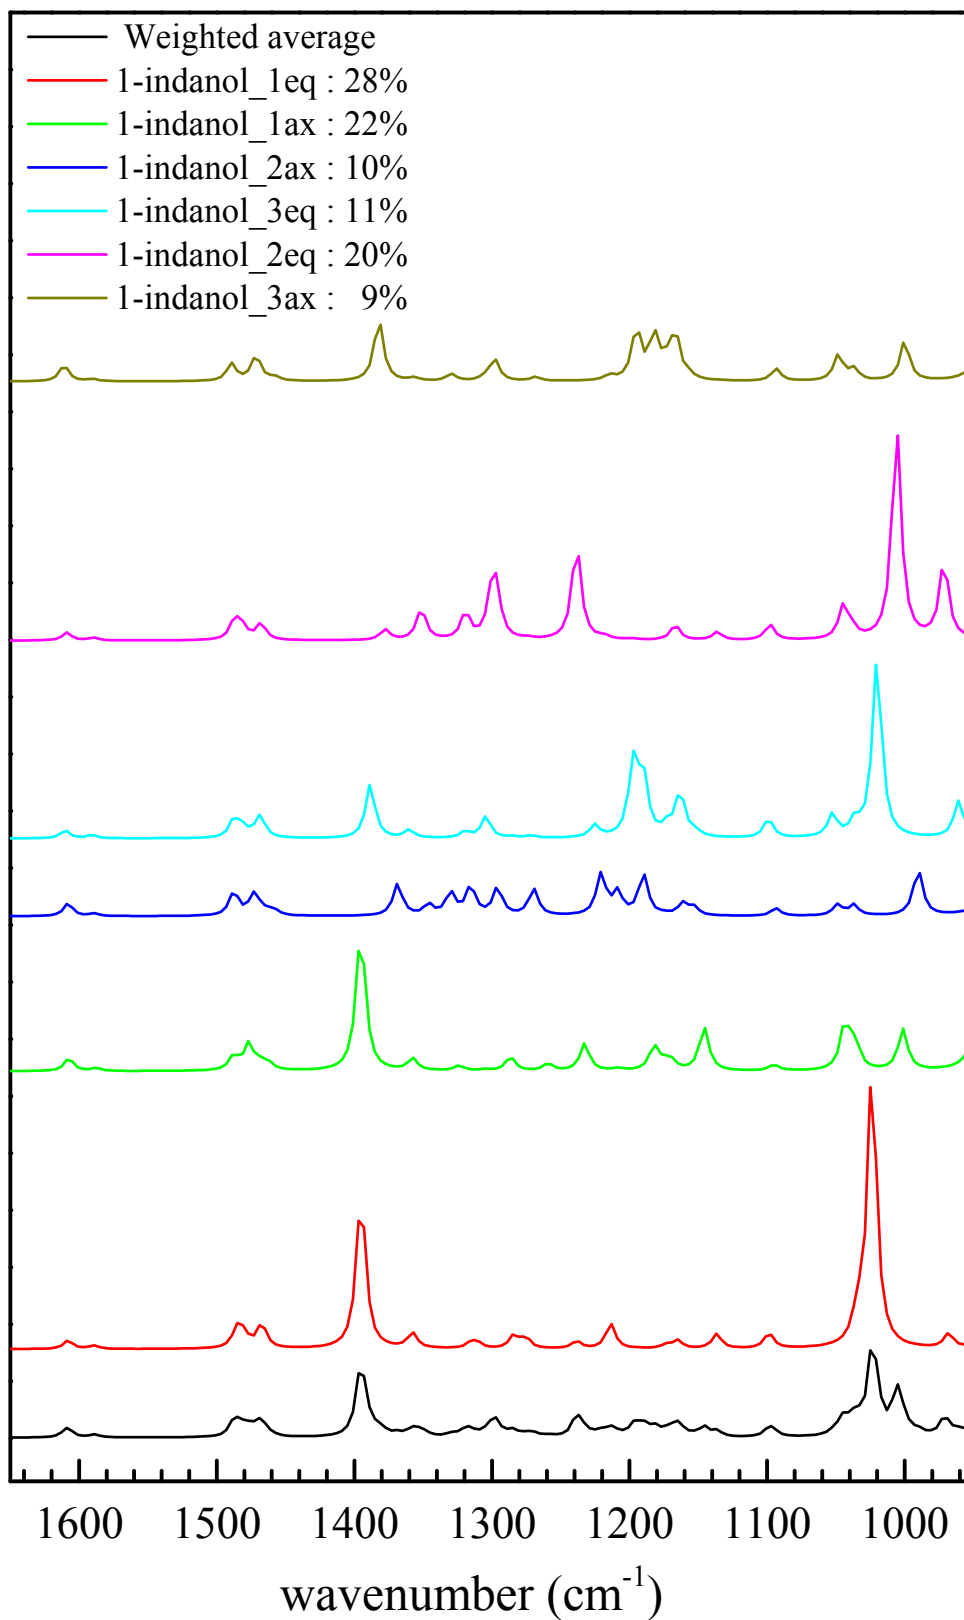

Figure S6: Simulated IR spectrum obtained from the weighted IR spectra of the most stable (S)-1-indanol structures in a  $\text{CCl}_4$  continuum together with individual contributions, calculated at the BLYP/6-31G++(d, p) level.



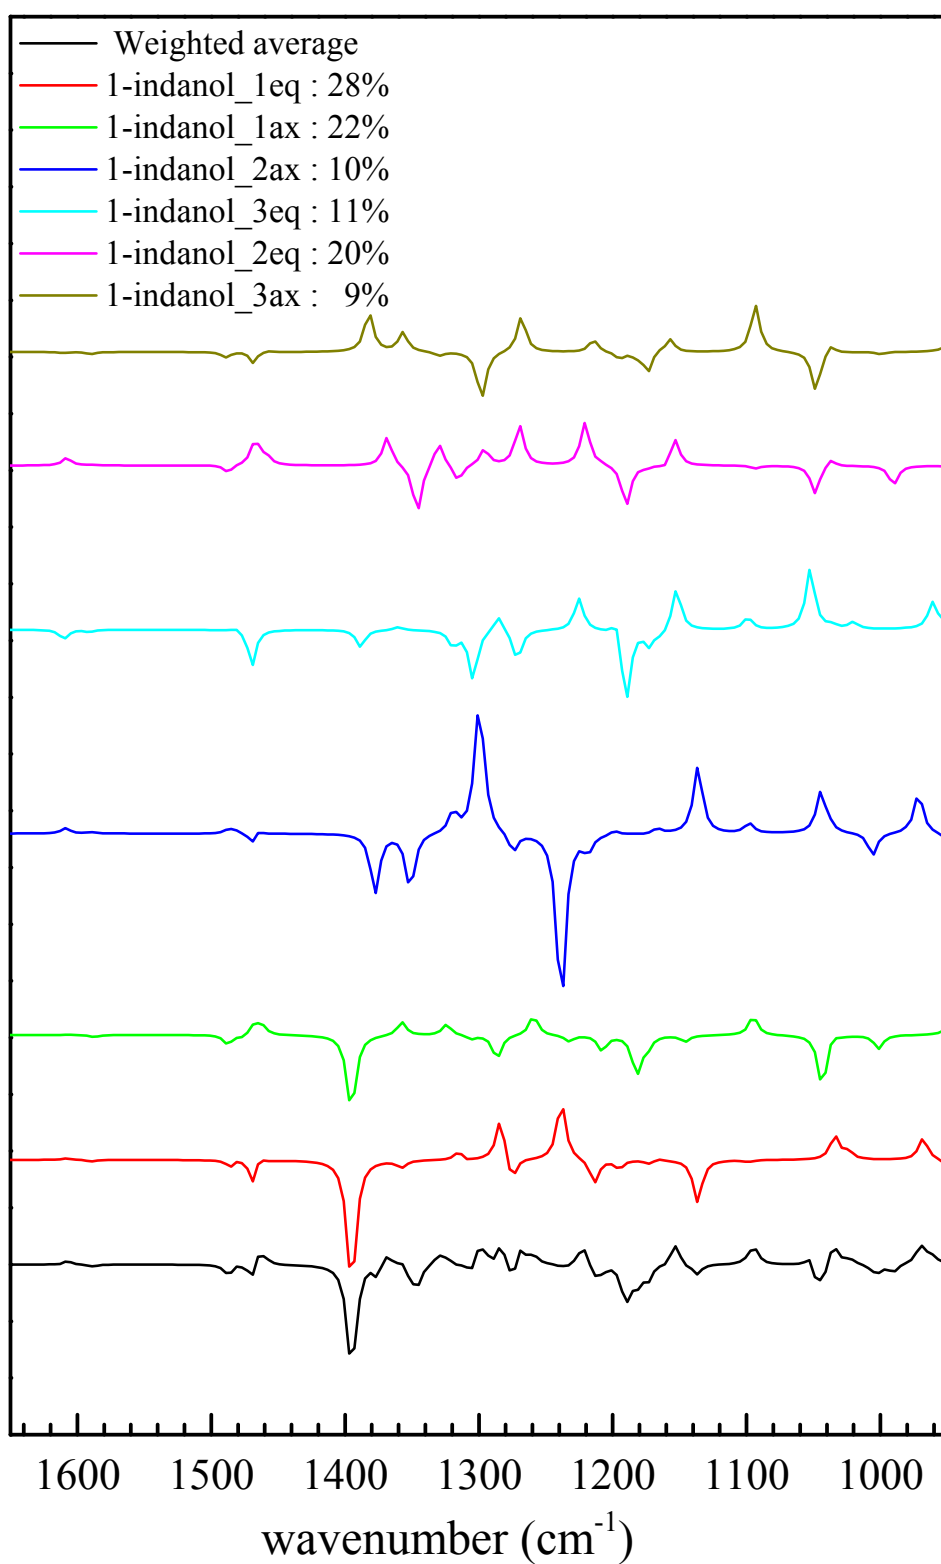

Figure S7: Simulated VCD spectrum obtained from the weighted VCD spectra of the most stable (S)-1-indanol structures in a  $\text{CCl}_4$  continuum together with individual contributions, calculated at the BLYP/6-31G++(d, p) level.

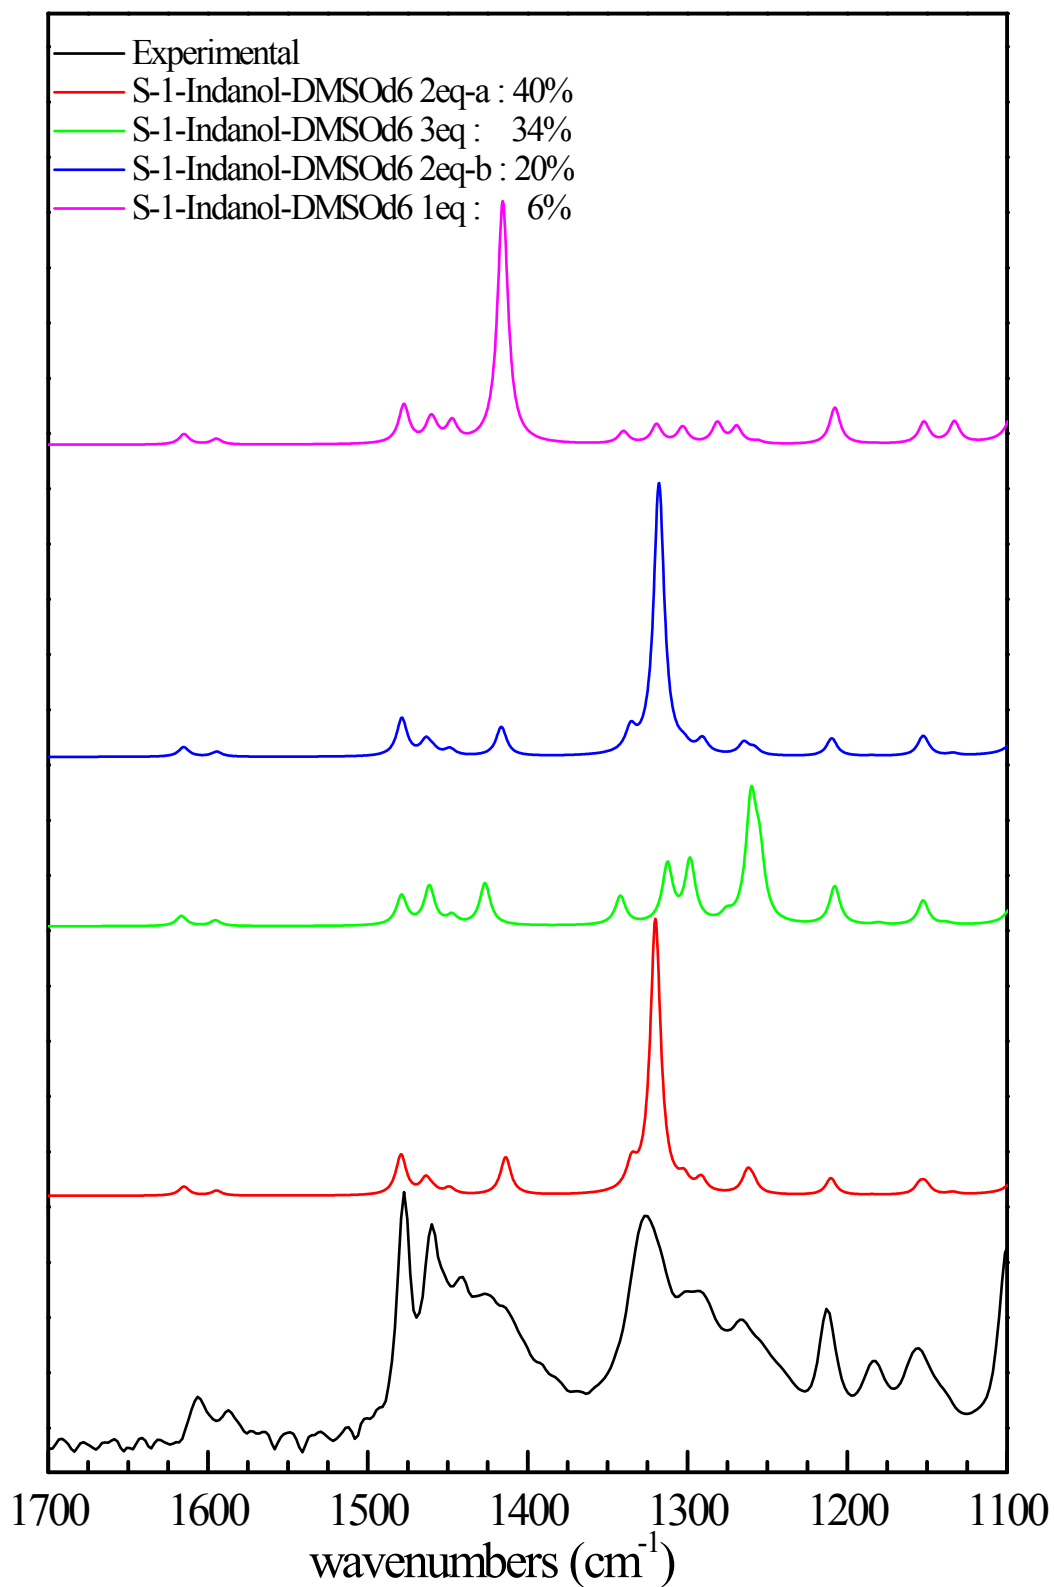

Figure S8: Simulated IR spectra of the most stable (S)-1-indanol:DMSO-d<sub>6</sub> complexes in a DMSO continuum, calculated at the B3LYP/6-31G++(d, p) level, together with experimental spectrum.

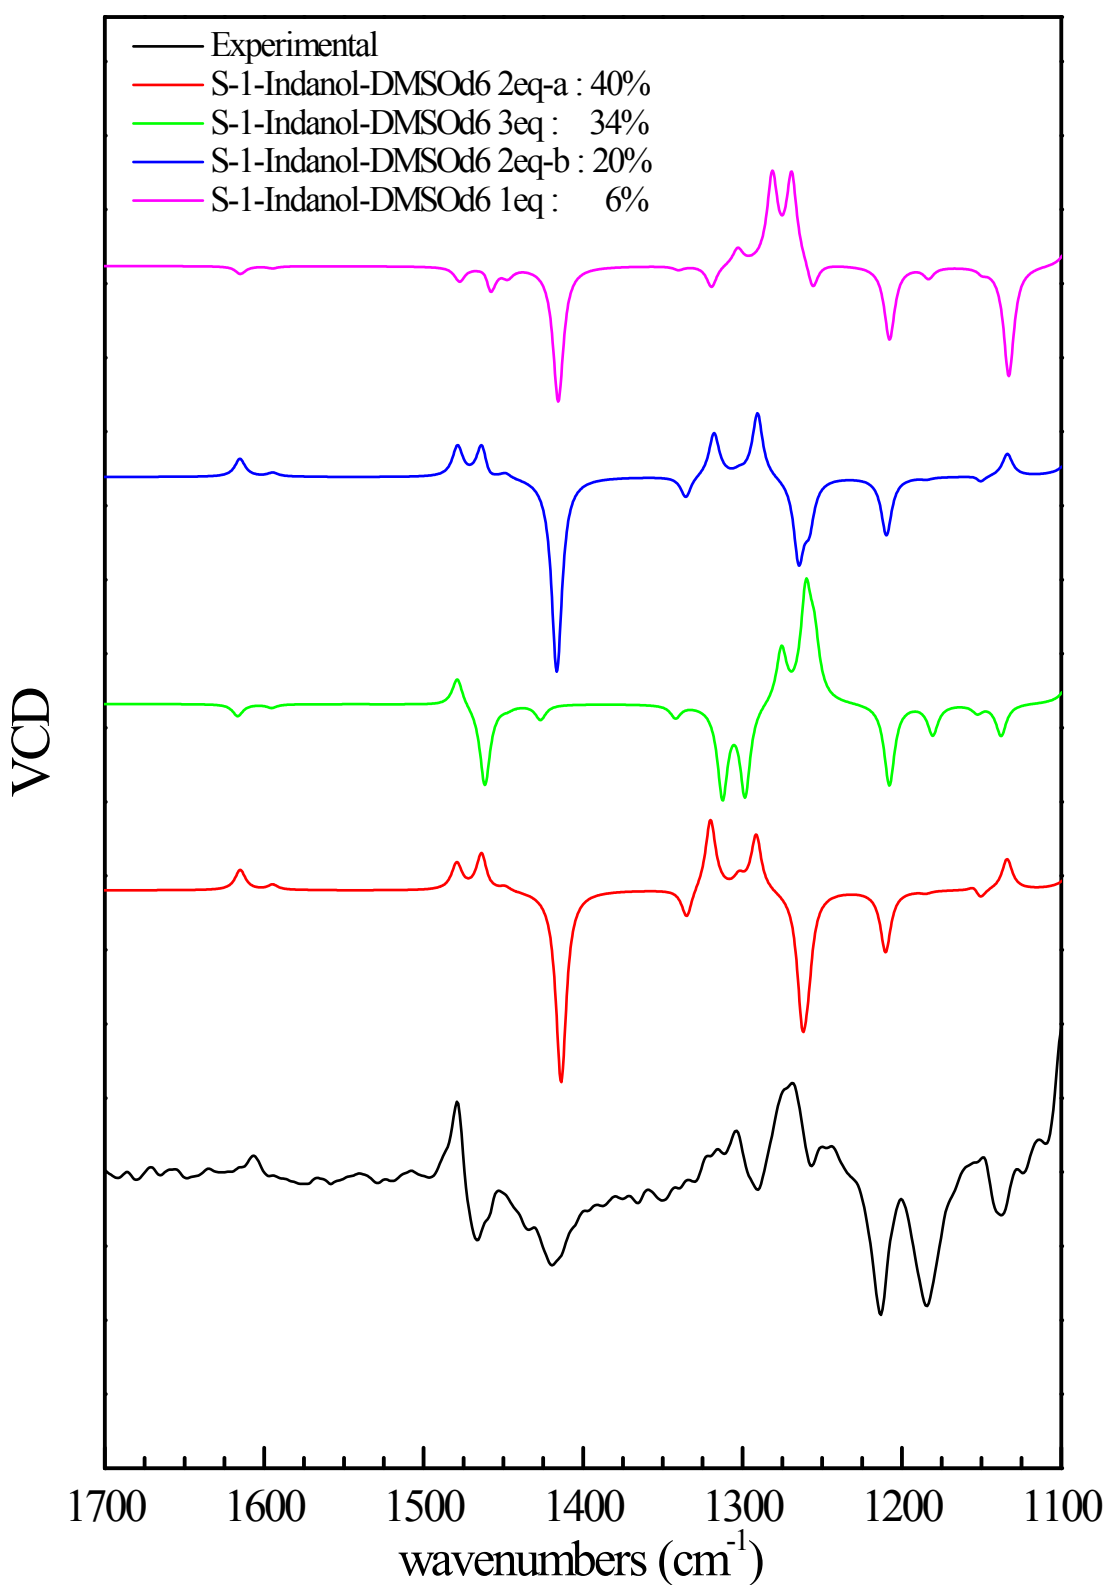

Figure S9: Simulated VCD spectra of the most stable (S)-1-indanol:DMSO-d6 complexes in a DMSO continuum, calculated at the B3LYP/6-31G++(d, p) level, together with experimental spectrum

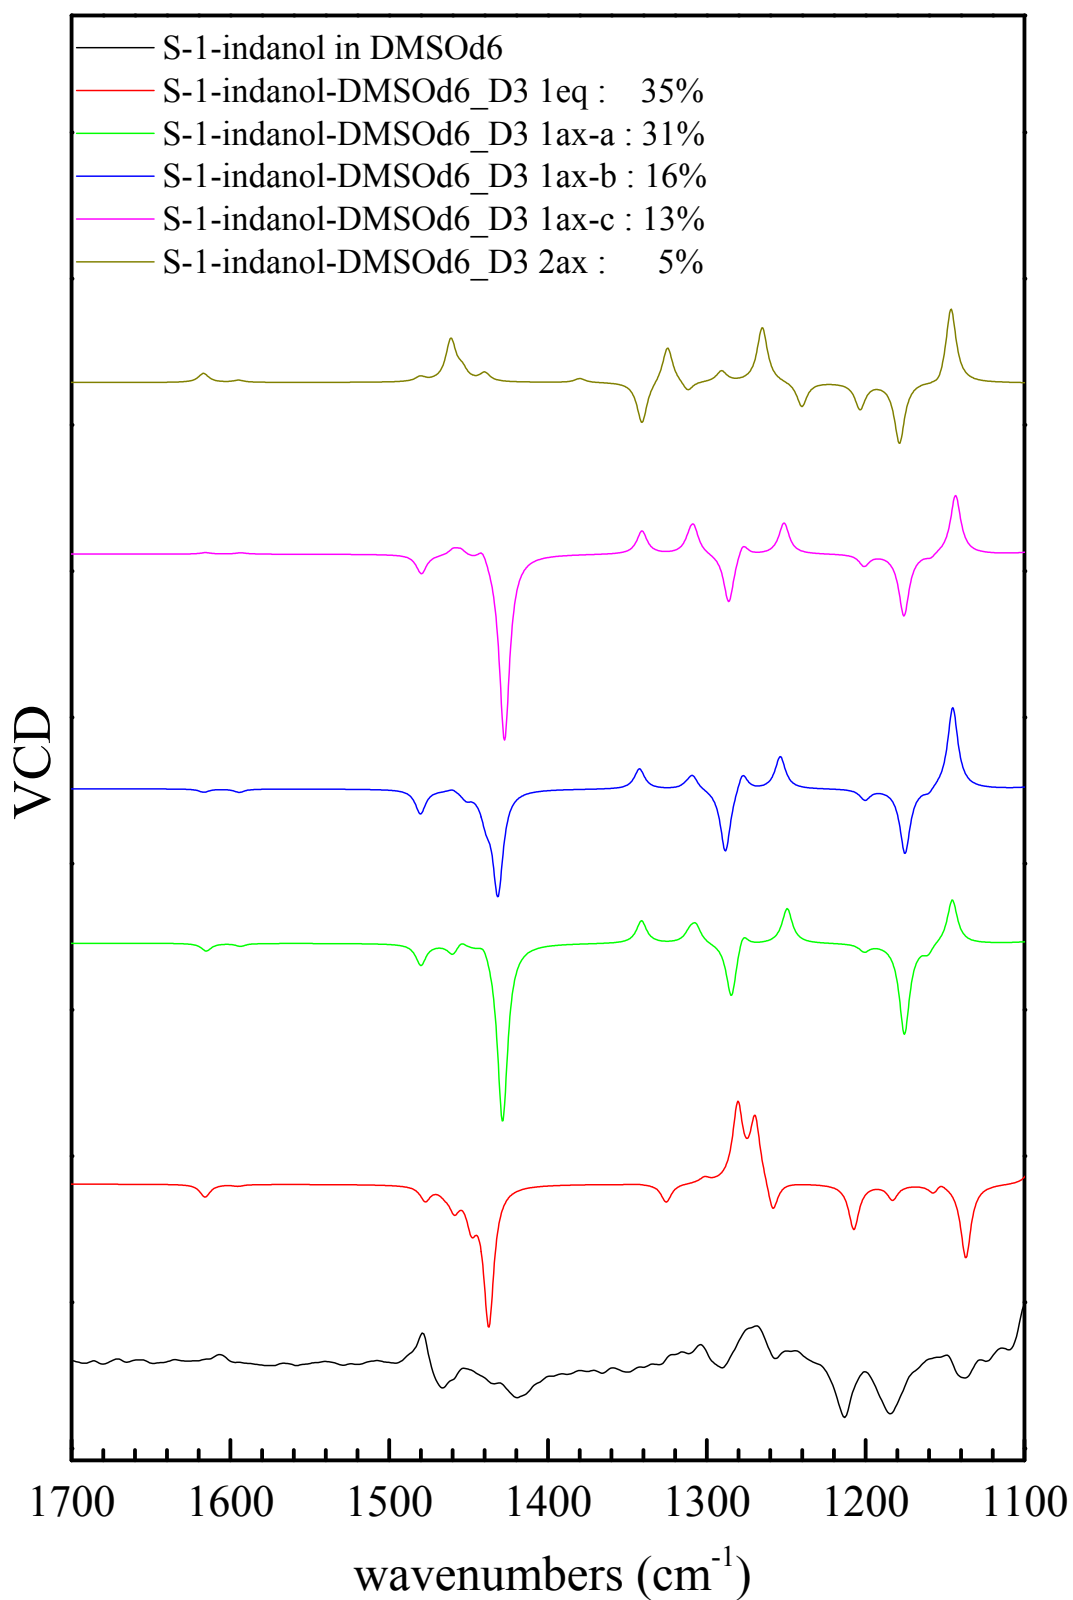

Figure S10: Simulated VCD spectra of the most stable (S)-1-indanol:DMSO-d<sub>6</sub> complexes in a DMSO continuum, calculated at the B3LYP-D3/6-31G++(d,p) level, together with experimental spectrum.

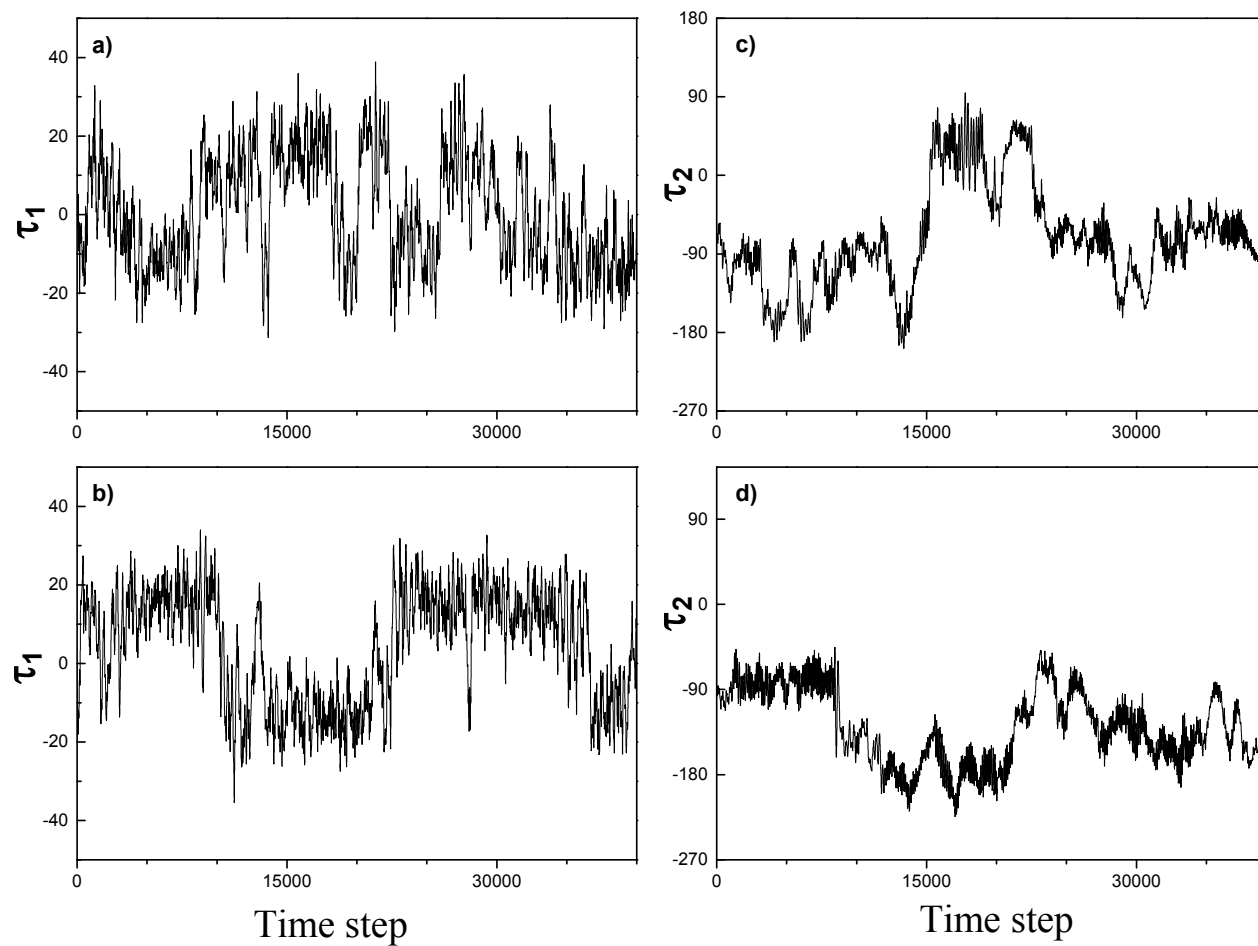

Figure S11. Evolution of the  $\tau_1$  and  $\tau_2$  angles during the NVE trajectories. a)  $\tau_1$  and b)  $\tau_2$  angles for the trajectory at 18ps c)  $\tau_1$  and d)  $\tau_2$  angles for the trajectory at 22ps.
